# Supplementary material for: Partitioning of chromium between garnet and clinopyroxene: first-principle modelling versus metamorphic assemblages
Source: Copernicus journal article supplement (doi:10.5194/ejm-32-387-2020), 2020-07-03
Supplement: Supplementary file 1 [file Appendix_Table A1.xlsx]

## Sheet: Feuil1
Table A1: Representative EPMA analyses for garnet and clinopyroxene in samples MA1435, MA1438, L3515 and SE1416B. “Symp” stands for analyses made in symplectites. ‘-‘: below detection limit
	Sample	MA1438	MA1438	MA1438	MA1438	MA1438	MA1438	MA1438	MA1435	MA1435	MA1435	MA1435	MA1435	L3515	L3515	L3515	L3515	SE1416B	SE1416B	SE1416B
	Phase	Grt	Grt	Grt	Cpx	Cpx	Amp	Plg	Grt	Grt	Grt	Cpx	Cpx	Grt	Grt	Cpx	Cpx	Grt	Grt	Cpx
	Zone	Core	Rim	Symp	Core	Rim	-	-	Core	Rim	Symp	Core	Rim	Core	Rim	Core	Rim	Rim	Core	-
Microprobe analyses (wt%) in garnet / TiO2 and Cr2O3 in ppm	SiO2	39.04	38.84	38.99	50.45	50.36	44.15	44.79	38.88	39.37	38.99	48.54	49	37.94	38.29	55.47	56.94	38.15	39.3	53.31
	TiO2	380.583	140.846	-	1703.93	595.747	3158.54	54.5402	551.395	337.43	370.993	3468.4	1274.2	477.676	351.215	379.384	674.261	2634.11	1302.37	-
	Al2O3	21.73	21.36	21.43	5.59	3.58	13.94	35.4	20.95	21.55	21.09	6.99	5.83	21.02	20.65	9.04	10.74	13.13	19.1	0.22
	Cr2O3	442.679	499.468	849.779	363.311	668.466	1023.57	-	213.471	256.576	186.787	145.051	438.574	2955.07	4866.73	313.365	459.784	451.574	54.7362	60.894
	FeO	21.01	22.64	22.38	8.9	8.8	13.89	0.31	22.53	23.68	23.25	10.86	9.74	30.1	29.66	8.17	8.54	11.95	4.82	8.26
	MnO	1.37	2.28	2.54	0.25	0.26	0.1	0.01	0.95	0.81	1.66	0.14	0.25	0.63	2161	671	484	0.36	0.39	0.4
	MgO	7.32	5.41	5.09	11.44	12.73	11.32	-	5.29	6.04	4.93	10.29	11	4.94	6.06	7.66	5.89	0.01	0.01	12.87
	CaO	10.43	10.12	10.39	22.49	23.14	11.66	18.26	13.12	10.69	11.79	23.54	22.3	6.23	5.75	11.43	9.48	34.6	35.46	24.65
	Na2O	0.03	0.02	0.05	0.8	0.76	1.88	1.5	-	0.02	1.01	0.74	0.69	0.05	0.02	9.5	9.43	-	-	0.17
	K2O	0.01	0.01	0.01	-	-	0.16	0.01	-	-	0.02	-	0.01	-	-	-	-	-	0.01	-
	Total	101.07	100.77	101	100.26	99.83	97.78	100.29	101.83	102.25	101.83	101.7	99.1	101.43	101.41	101.44	101.25	98.69	99.32	99.89
Structural formula (12 oxygen atoms)	Si	2.97	3	3.01	1.88	1.9	6.47	0.92	2.98	2.99	2.99	1.81	1.86	2.97	2.98	1.99	2.03	3.08	3.04	2
	Ti	0	0	0	0.01	0	0.06	0.01	0.01	0	0	0.02	0.01	0	0	0	0	0.02	0.01	0
	Al	1.95	1.94	1.95	0.25	0.16	2.41	0.36	1.89	1.93	1.91	0.31	0.26	1.94	1.89	0.38	0.45	1.47	1.76	0.01
	Cr	0.0039	0.0045	0.0076	0.0016	0.0029	0.0173	0	0.0019	0.0023	0.0017	0.0006	0.0019	0.0267	0.0438	0.0013	0.0019	0.0006	0.0008	0.0002
	Fe	1.34	1.46	1.44	0.28	0.28	1.7	0.03	1.44	1.5	1.49	0.34	0.31	1.97	1.93	0.25	0.25	0.63	0.29	0.26
	Mn	0.09	0.15	0.17	0.01	0.01	0.01	0.02	0.06	0.05	0.11	0	0.01	0.04	0.01	0	0	0.04	0.03	0.01
	Mg	0.83	0.62	0.58	0.64	0.71	2.47	0.01	0.6	0.68	0.56	0.57	0.62	0.58	0.7	0.41	0.31	0	0	0.72
	Ca	0.85	0.84	0.86	0.9	0.93	1.83	0.22	1.08	0.87	0.97	0.94	0.91	0.52	0.48	0.44	0.36	2.94	2.93	0.99
	Na	0	0	0.01	0.06	0.06	0.53	0.97	0	0	0	0.05	0.05	0.01	0	0.66	0.65	0	0	0.01
	K	0	0	0	0	0	0.03	0.02	0	0	0	0	0	0	0	0	0	0	0	0
