# Supplementary material for: Partitioning of chromium between garnet and clinopyroxene: first-principle modelling versus metamorphic assemblages
Source: Copernicus journal article supplement (doi:10.5194/ejm-32-387-2020), 2020-07-03
Supplement: Supplementary file 1 [file ejm-32-387-2020-supplement.zip]

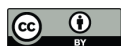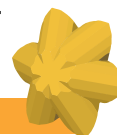

## *Supplement of*

# **Partitioning of chromium between garnet and clinopyroxene: first-principle modelling versus metamorphic assemblages**

**Sarah Figowy et al.**

*Correspondence to:* Sarah Figowy ([sarah.figowy@sorbonne-universite.fr](mailto:sarah.figowy@sorbonne-universite.fr))

- [ejm-32-387-2020-supplement-title-page.pdf](#)
- Supplements
  - [Appendix\\_Table A1.xlsx](#)
  - [CIF files](#)
    - \* [CIF\\_garnet](#)
    - \* [CIF\\_pyroxene](#)
  - [Figure S1.pdf](#)
  - [Table S1.xlsx](#)

The copyright of individual parts of the supplement might differ from the CC BY 4.0 License.
