# Supplementary material for: Partitioning of chromium between garnet and clinopyroxene: first-principle modelling versus metamorphic assemblages
Source: Copernicus journal article supplement (doi:10.5194/ejm-32-387-2020), 2020-07-03
Supplement: Supplementary file 2 [file Table S1.xlsx]

## Sheet: Feuil1
					Cell parameters
Name	Base	100*Cr/(Cr+Al)	Primitive cell volume (Å3)	Optimised energy (Ha)	a (Å)	b (Å)	c (Å)	alpha (°)	beta (°)	gamma (°)	X-site volume (Å3)	Y-site volume (Å3)
Grs	grossular	0	854.734	-17160.5	10.355	10.355	10.355	109.471	109.471	109.471	22.043	9.76452
CrGrs_S1	grossular	12.5	858.88	-17962.4	10.3796	10.3796	10.3796	109.533	109.533	109.533	22.1149	10.697
CrGrs_S2	grossular	6.25	1713.37	-35122.9	11.966	11.966	11.966	90.0656	90.0656	90.0656	-	10.6785
CrGrs_S4	grossular	3.125	3422.49	-69443.9	19.8402	19.8402	19.8402	117.04	117.04	117.04	22.0762	10.6756
Prp	pyrope	0	770.604	-11430.6	10.0035	10.0035	10.0035	109.471	109.471	109.471	18.5496	9.13545
CrPrp_S1	pyrope	12.5	774.52	-12232.5	10.0228	10.0228	10.0228	109.491	109.491	109.491	18.5794	10.1298
CrPrp_S2	pyrope	6.25	1545.09	-23663	11.5607	11.5607	11.5607	90.0209	90.0209	90.0209	-	10.1263
CrPrp_S4	pyrope	3.125	3086.17	-46524.2	19.1646	19.1646	19.1646	117.037	117.037	117.037	18.5428	10.1071
Uv	uvarovite	100	889.426	-23576	10.4933	10.4933	10.4933	109.471	109.471	109.471	22.5857	10.8773
AlUv_S1	uvarovite	87.5	885.041	-22774	10.4689	10.4689	10.4689	109.416	109.416	109.416	22.5113	9.8888
AlUv_S2	uvarovite	93.75	1774.5	-46350	12.1067	12.1067	12.1067	89.9421	89.9421	89.9421	-	9.90919
AlUv_S4	uvarovite	96.875	3553.38	-93502	20.0802	20.0802	20.0802	117.031	117.031	117.031	22.5381	9.93508
Kno	knorringite	100	803.155	-17846	10.1424	10.1424	10.1424	109.471	109.471	109.471	18.9549	10.2903
AlKno_S1	knorringite	87.5	799.02	-17044	10.1243	10.1243	10.1243	109.466	109.466	109.466	18.917	9.27391
AlKno_S2	knorringite	93.75	1602.2	-34890	11.7014	11.7014	11.7014	89.9984	89.9984	89.9984	-	9.32156
AlKno_S4	knorringite	96.875	3208.84	-70581.9	19.4122	19.4122	19.4122	117.034	117.034	117.034	18.9404	9.30784
Jd	jadeite	0	207.276	-2871.35	6.43753	6.43753	5.2864	76.7307	103.269	95.7482	25.0057	9.64248
CrJd_S1	jadeite	50	211.895	-3673.28	6.49128	6.49128	5.31702	76.6743	103.326	95.6607	25.5347	10.6497
CrJd_S2	jadeite	25	419.031	-6544.63	9.25298	7.35802	8.67334	53.8838	62.0534	69.4022	25.2334	10.6462
CrJd_S4	jadeite	12.5	833.643	-12287.3	9.56678	8.65584	10.5882	89.9984	108.049	90.0029	25.0911	10.6858
CrJd_S8	jadeite	6.25	1662.82	-23772.7	12.8888	12.8885	10.5802	76.7214	103.274	95.7261	25.0868	10.5812
CrJd_S16	jadeite	3.125	3321.01	-46743.5	19.1024	17.2865	10.5768	89.9865	108.035	90.0166	-	10.5807
Kos	kosmochlor	100	216.665	-4475.22	6.5479	6.5479	5.3399	76.7496	103.25	95.6527	25.8516	10.8115
AlKos_S1	kosmochlor	50	211.915	-3673.28	6.49162	6.49162	5.3173	76.6665	103.334	95.6631	25.3037	9.76934
AlKos_S2	kosmochlor	75	428.474	-8148.5	9.31942	7.41151	8.75175	53.8149	61.9923	69.4843	25.5815	9.74186
AlKos_S4	kosmochlor	87.5	861.844	-17098.9	9.68453	8.77249	10.6686	90.0027	108.035	89.9991	25.7022	9.92662
AlKos_S8	kosmochlor	93.75	1728.57	-34999.8	13.0818	13.0817	10.6741	76.7415	103.258	95.6533	25.7489	9.79826
