# Supplementary figures and images for: Partitioning of chromium between garnet and clinopyroxene: first-principle modelling versus metamorphic assemblages
Source: Copernicus journal article supplement (doi:10.5194/ejm-32-387-2020), 2020-07-03

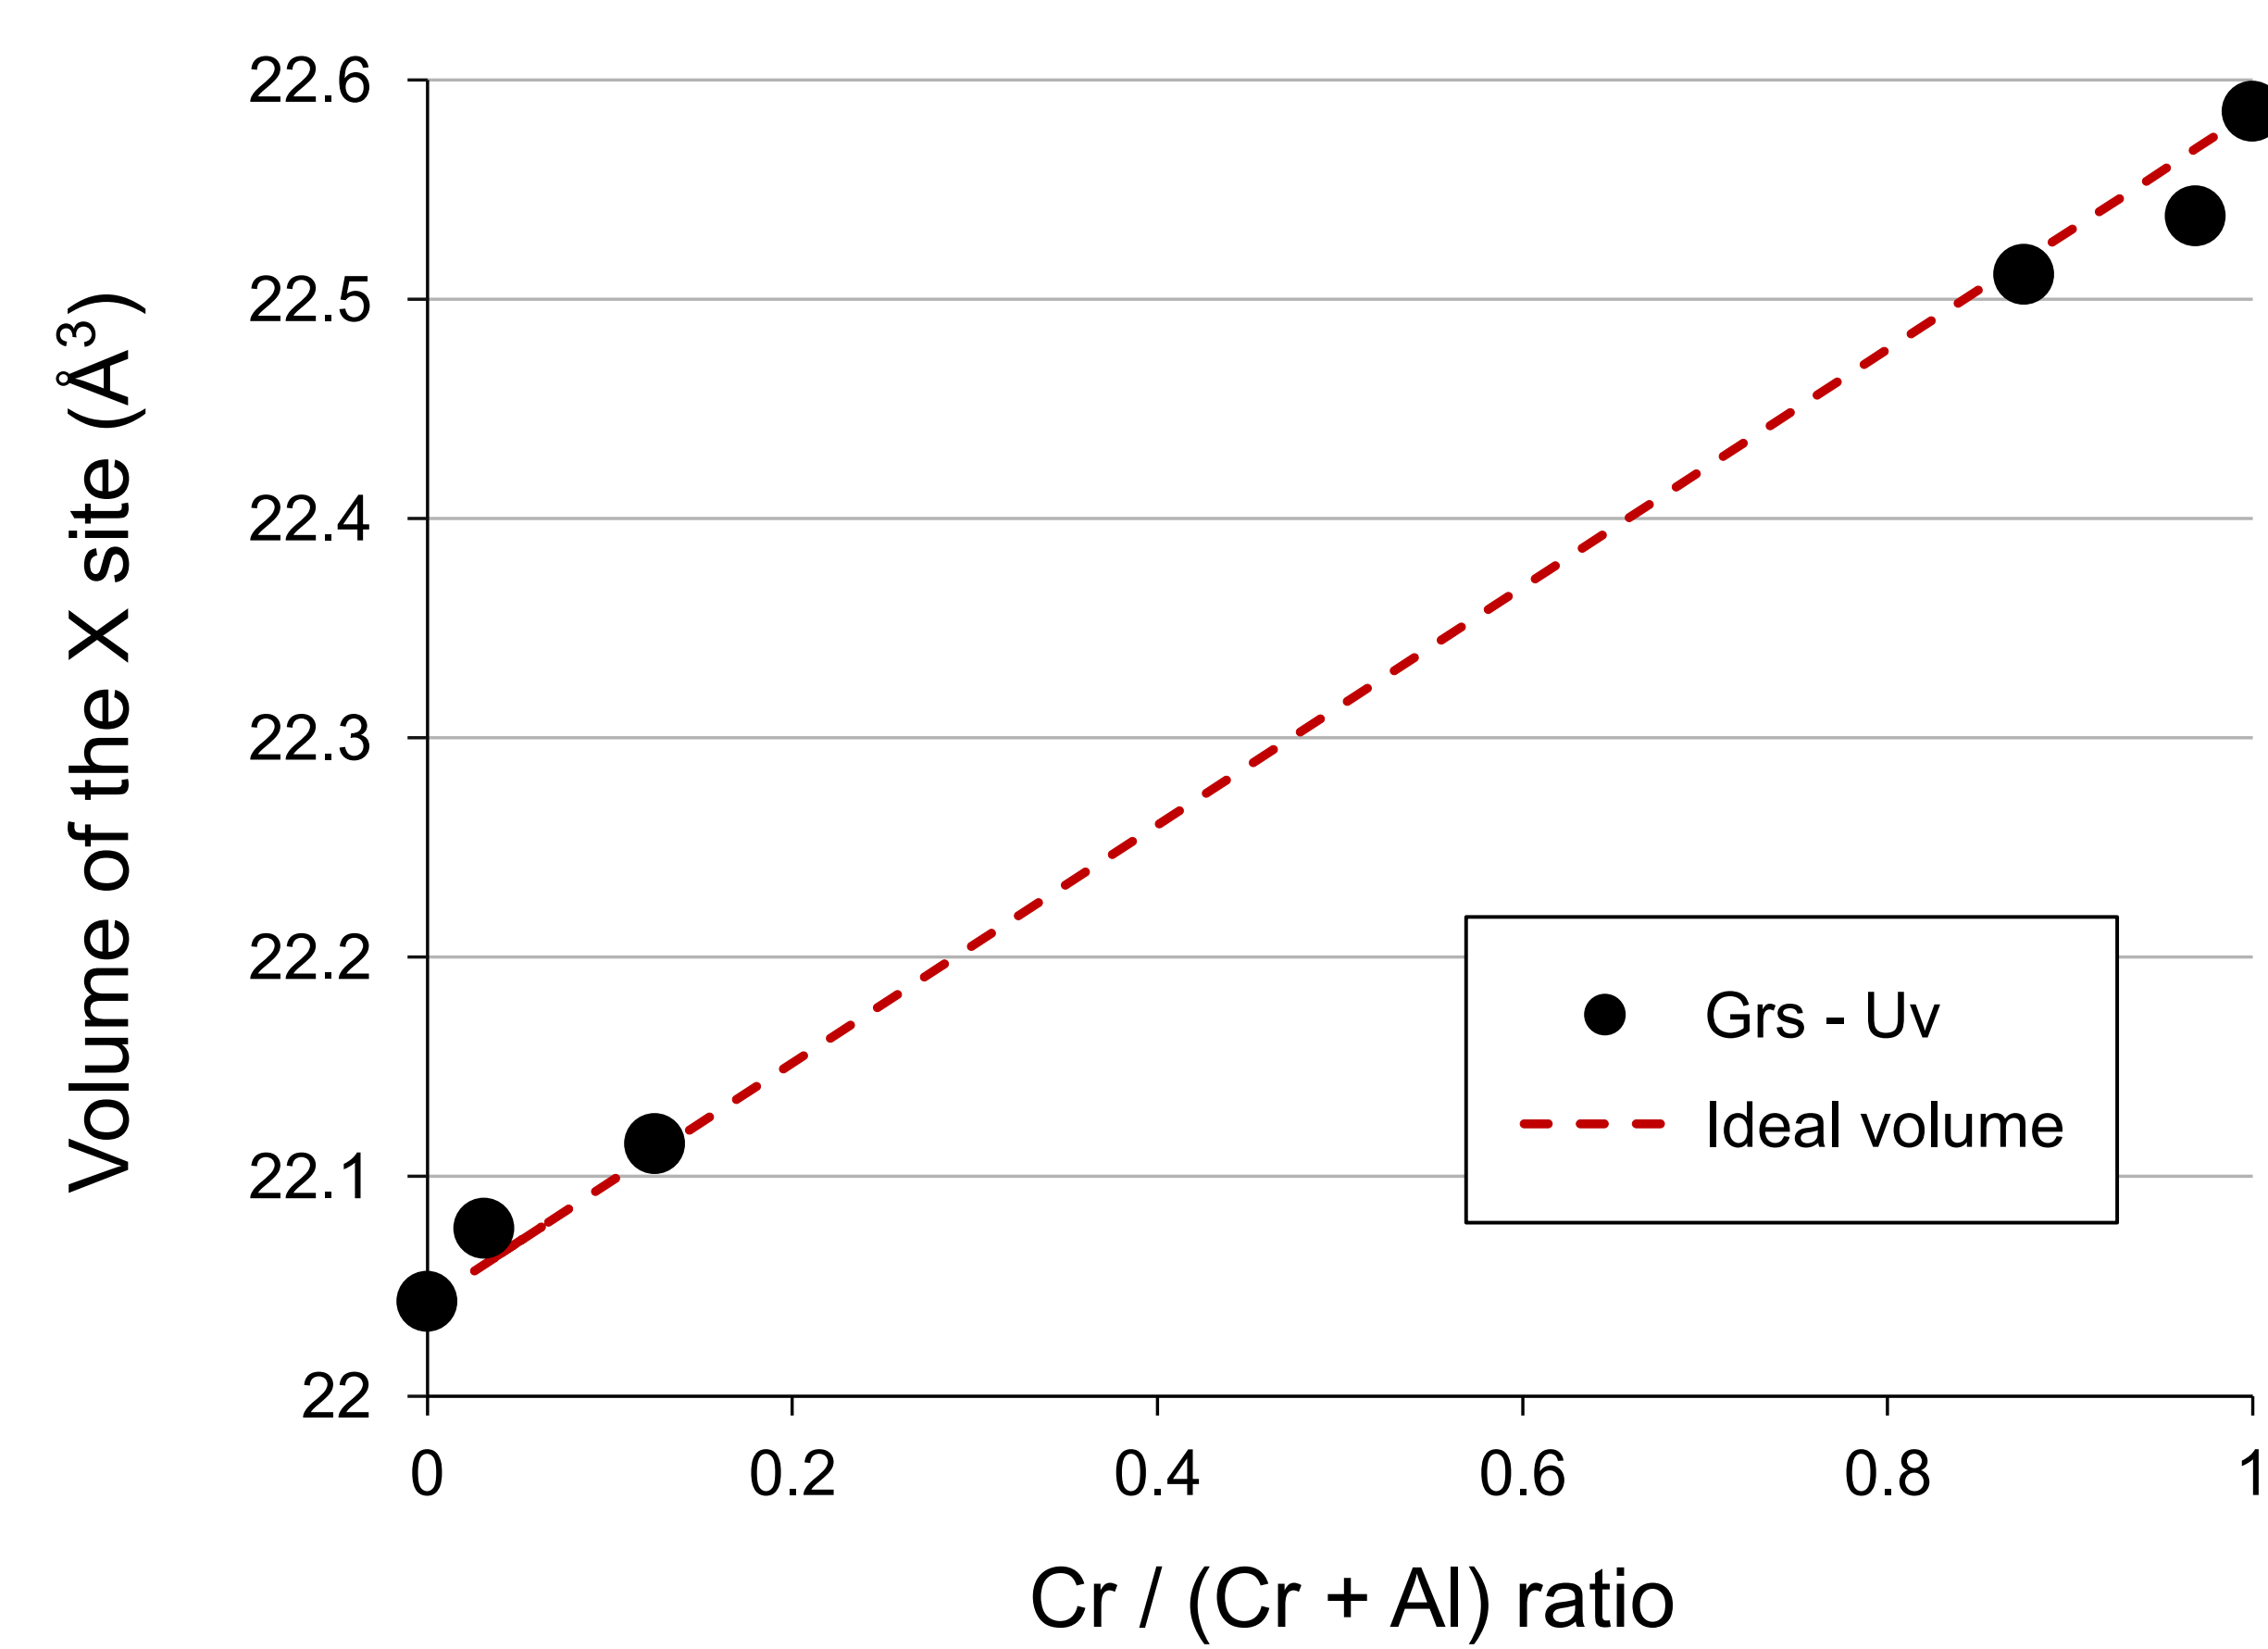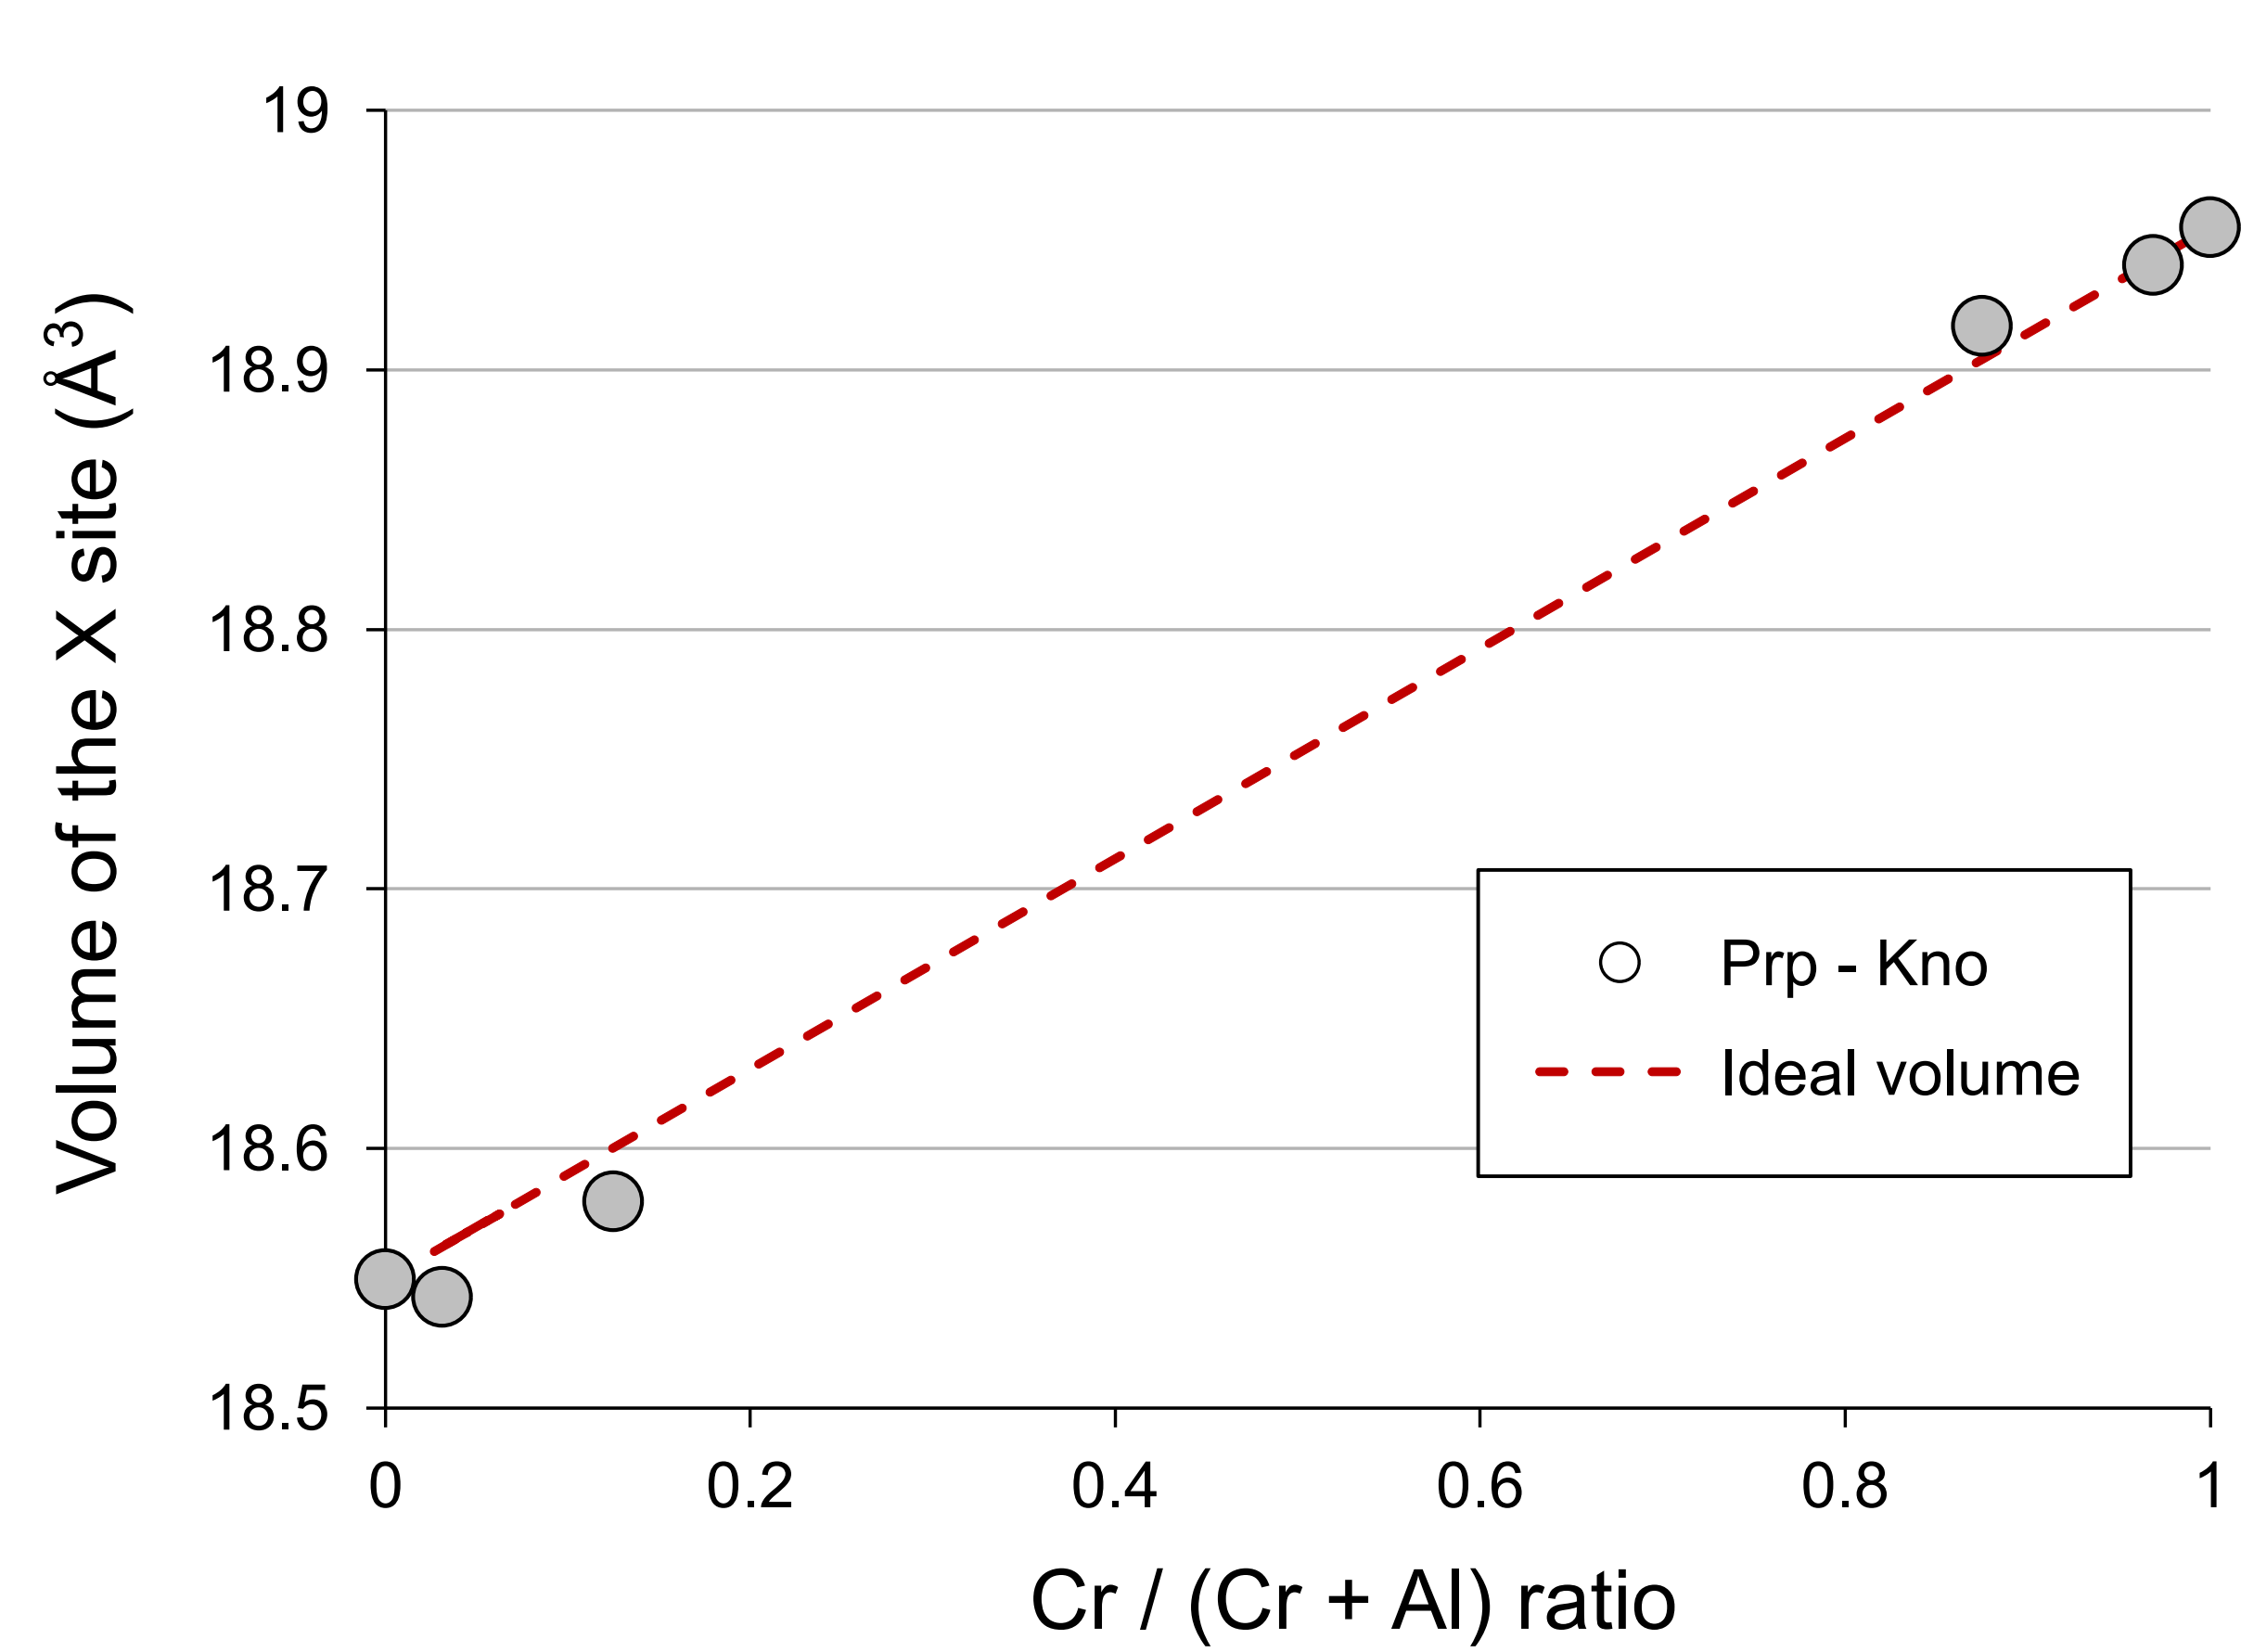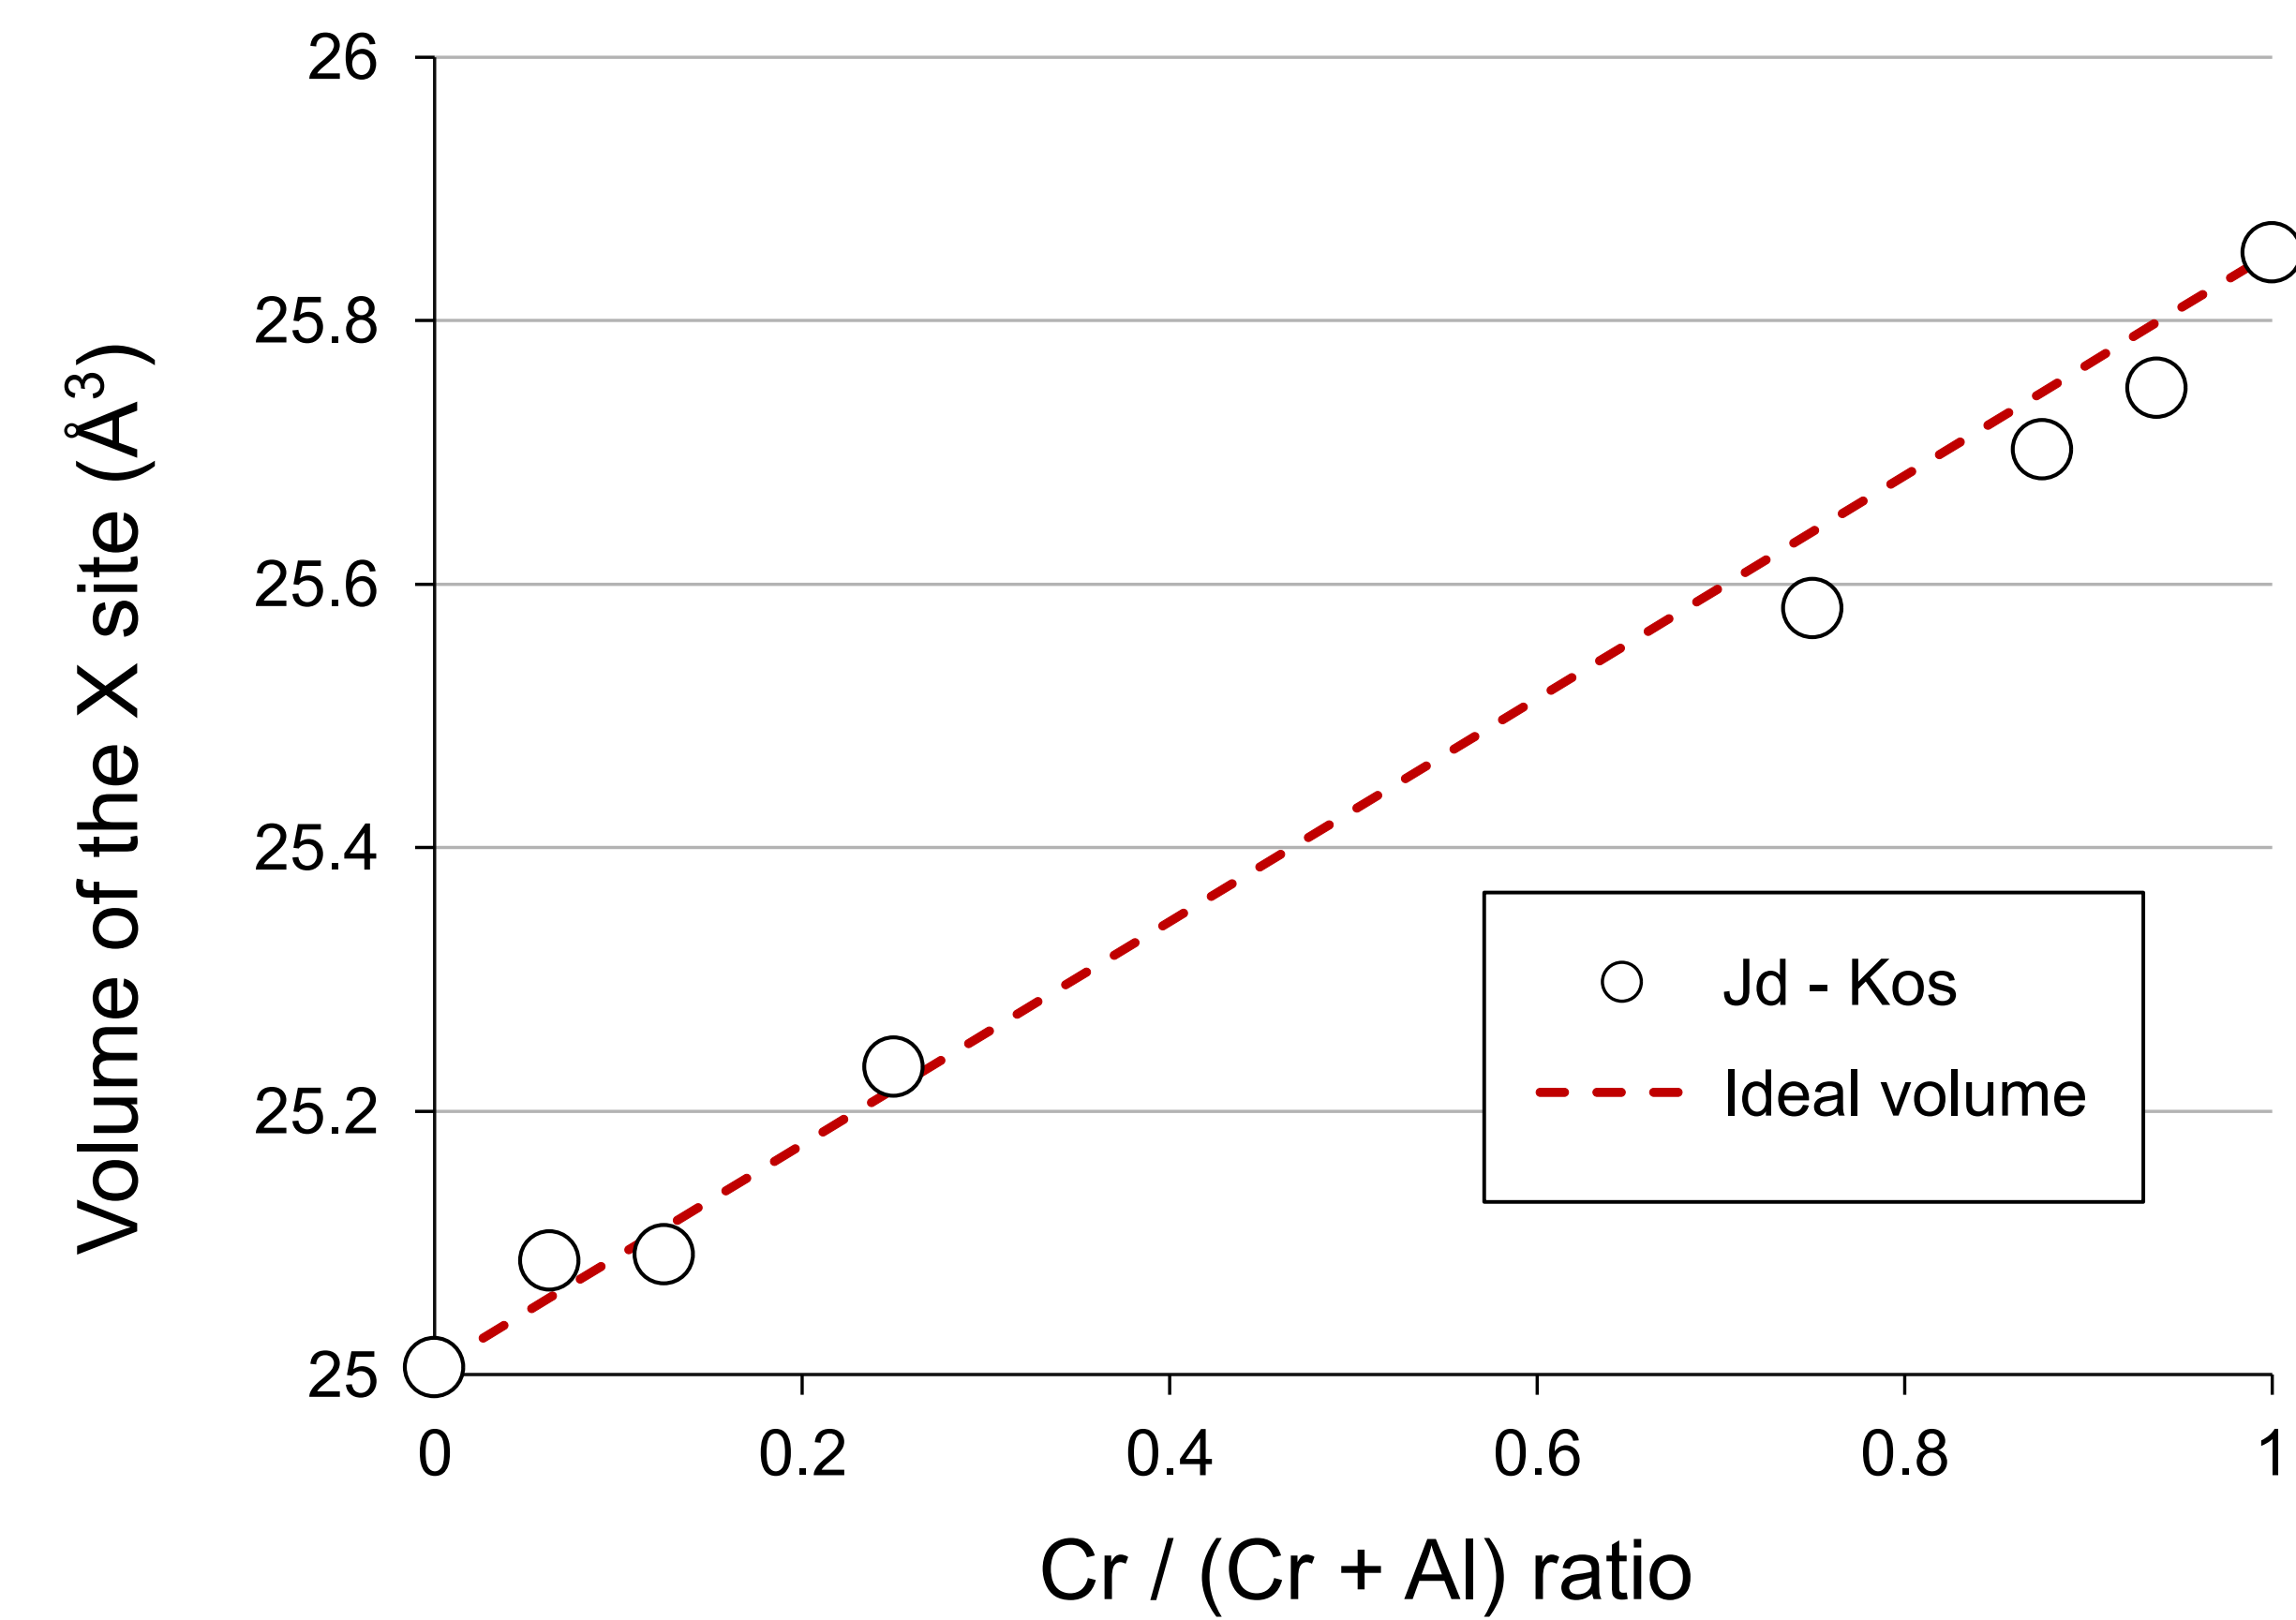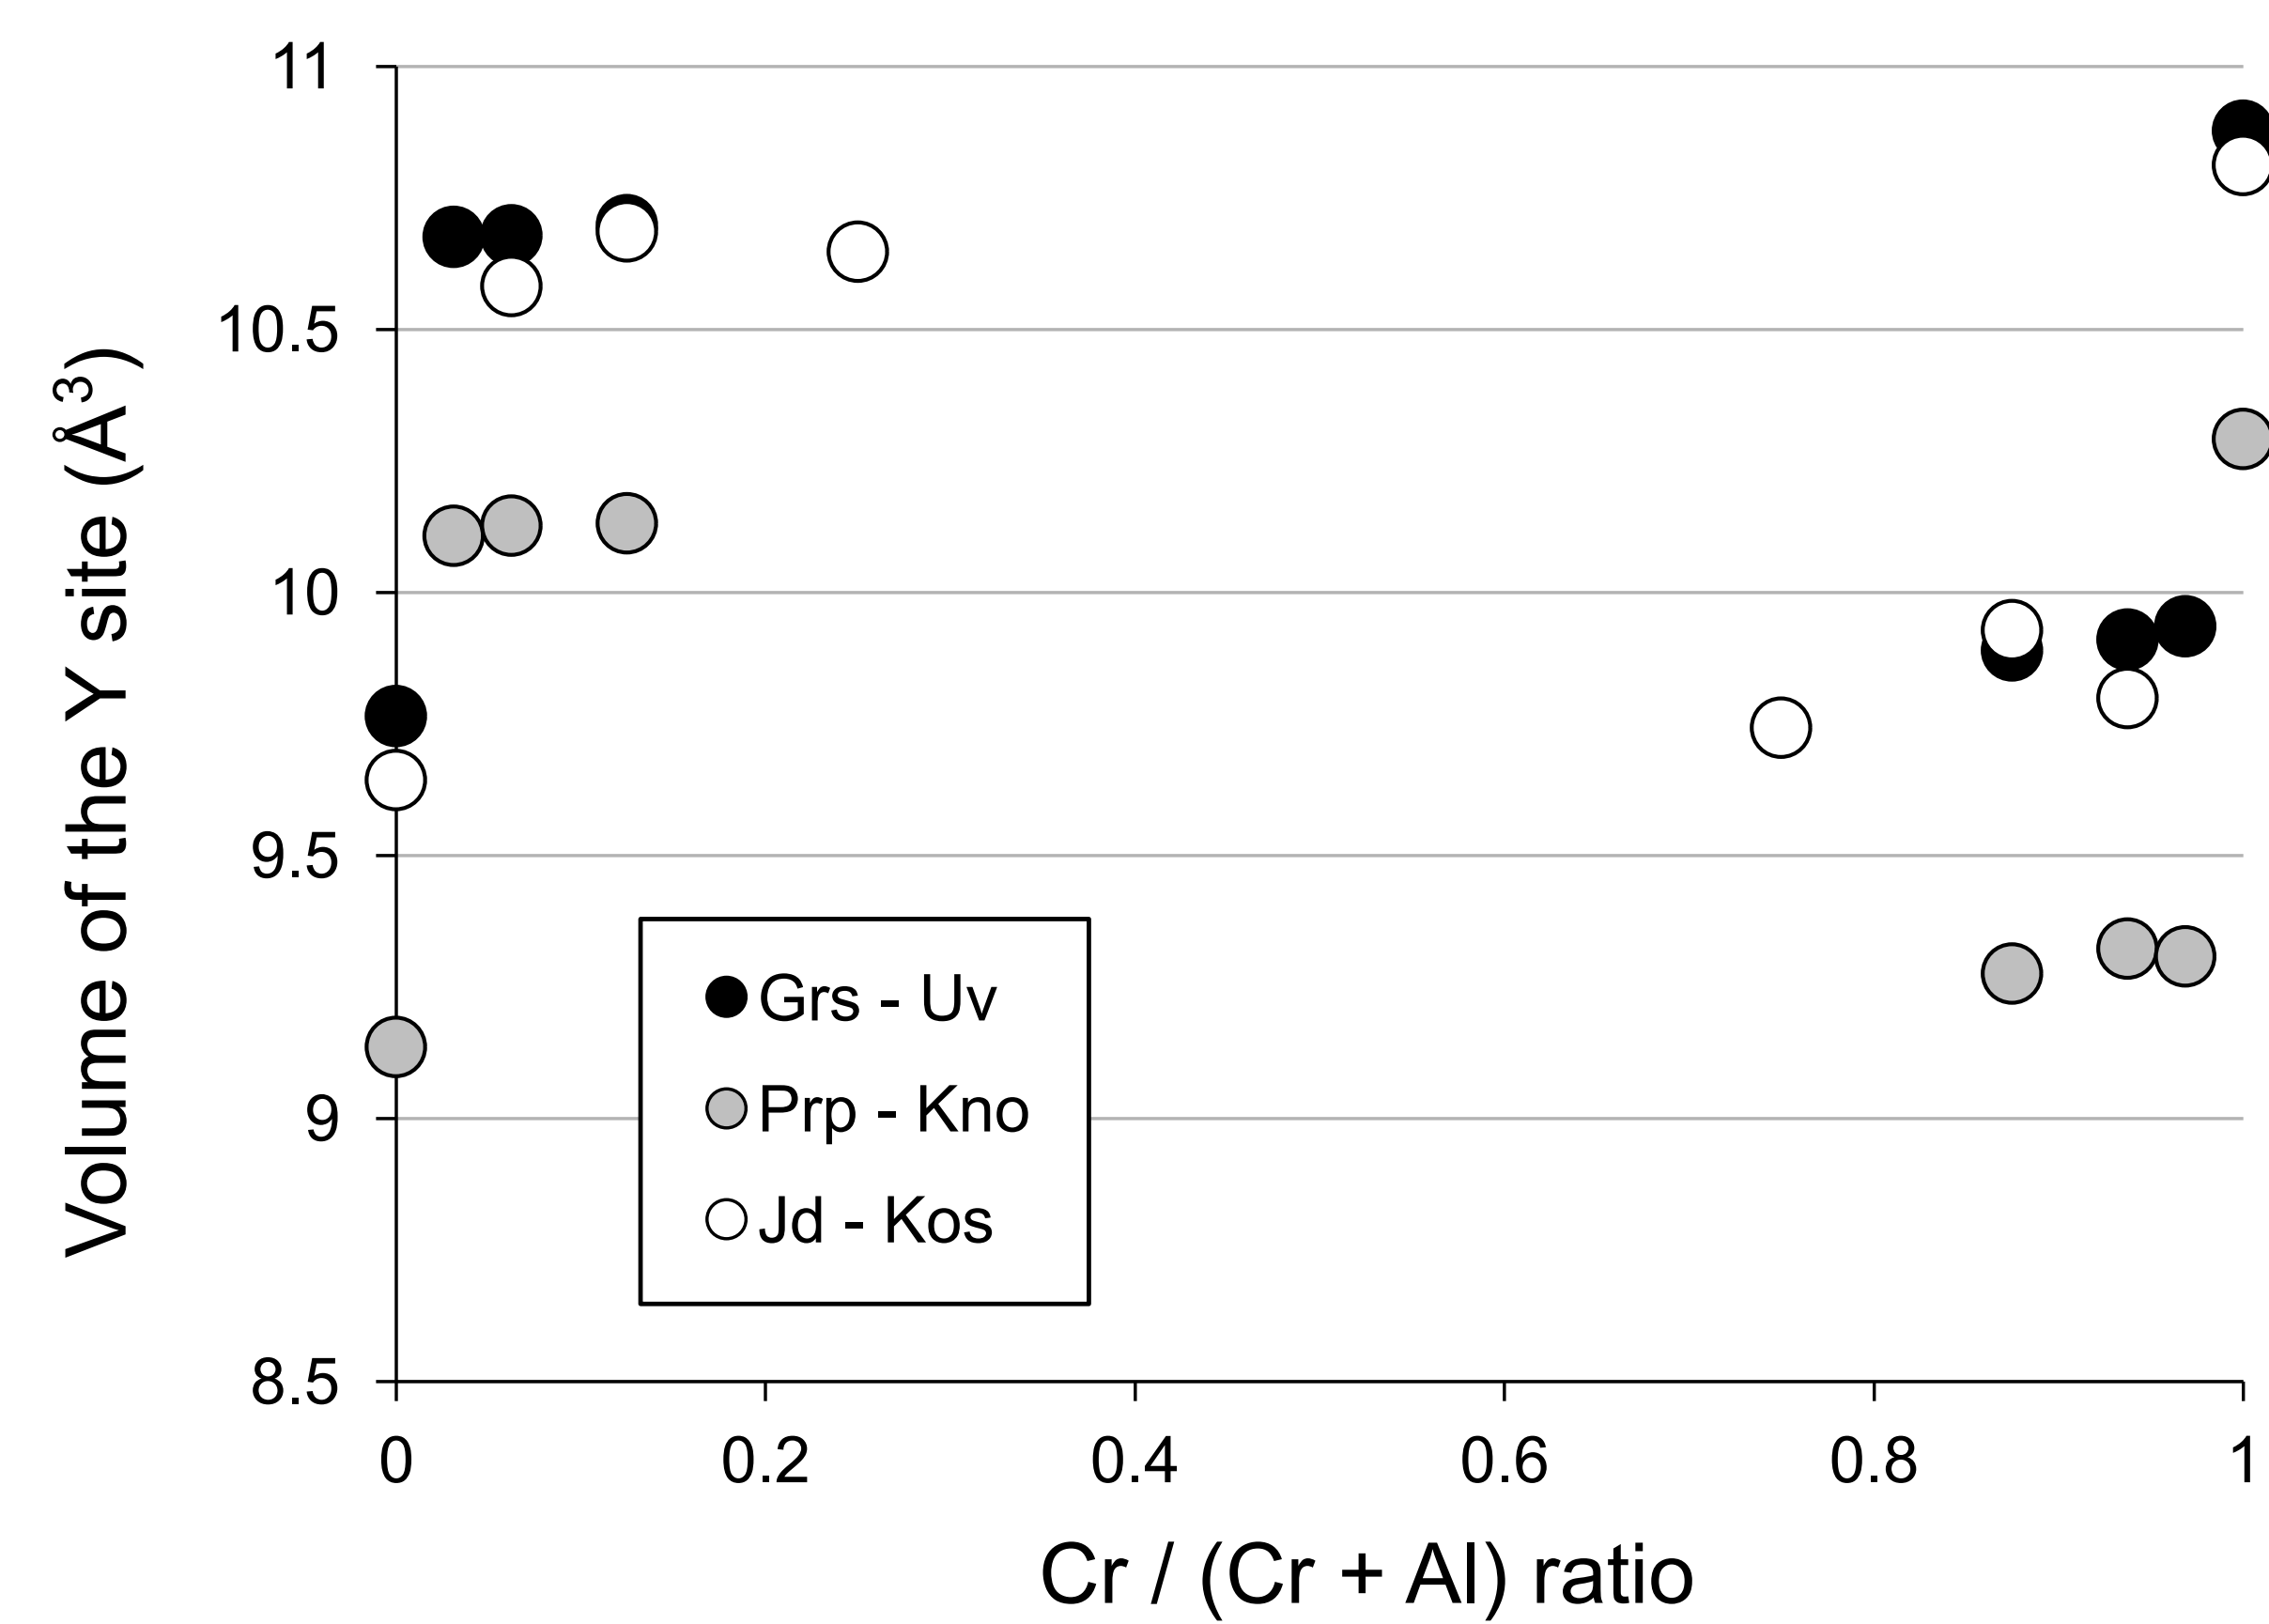

Supplement: Supplementary file 2 [file ejm-32-387-2020-supplement.zip]
